# Supplementary material for: Tandem driven dynamic combinatorial resolution via Henry–iminolactone rearrangement
Source: Royal Society of Chemistry journal article supplement (doi:10.1039/b716521h), 2007-12-17
Supplement: b716521h.pdf [file b716521h.pdf]

## Supporting information for:

# Tandem Driven Dynamic Combinatorial Resolution via Henry – Iminolactone Rearrangement

Marcus Angelin, Pornrapee Vongvilai, Andreas Fischer, and Olof Ramström\*

*KTH - Royal Institute of Technology, Department of Chemistry  
Teknikringen 30, S-10044 Stockholm, Sweden*

### General methods

All commercially available starting materials and solvents were of reagent grade and used as received.  $^1\text{H}$  and  $^{13}\text{C}$  spectra were recorded with a Bruker Avance 400 instrument or a Bruker DMX 500 instrument at 298K in  $\text{CD}_3\text{CN}$  or DMSO, using the residual signals:  $^1\text{H}$ :  $\delta = 1.94$  ppm;  $^{13}\text{C}$ :  $\delta = 1.32$  ppm and  $^1\text{H}$ :  $\delta = 2.50$  ppm;  $^{13}\text{C}$ :  $\delta = 39.52$  ppm respectively.  $^1\text{H}$  peak assignments were made by first order analysis of the spectra, supported by standard  $^1\text{H}$ - $^1\text{H}$  correlation spectroscopy (COSY). High resolution mass spectra (HRMS) were performed by Instrumentstationen, Kemiteknik, Lund Institute of Technology, Lund, Sweden.

### General procedure for library generation and resolution

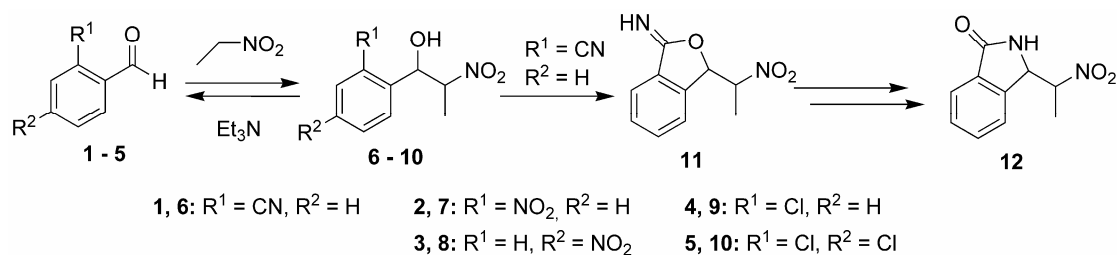

The various aldehydes **1-5** (0.15 mmol each) were dissolved in an NMR tube using 750  $\mu\text{L}$   $\text{CD}_3\text{CN}$ . Subsequently, nitroethane (0.15 mmol) and triethylamine (0.45 mmol) were added and the mixture was left at room temperature. The reaction was followed by  $^1\text{H}$ -NMR analysis.

## Analytical data for compound 12

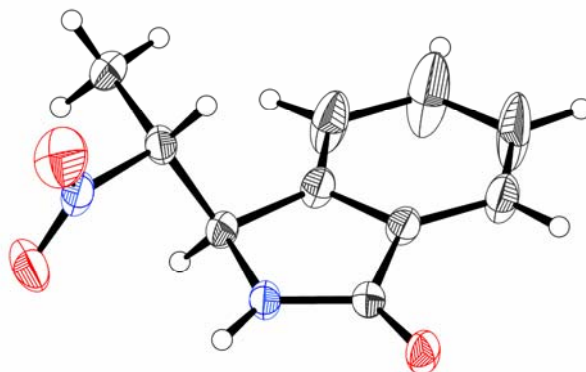

$^1\text{H}$  NMR (500 MHz, DMSO)  $\delta$  1.16 (d,  $J = 6.94$  Hz), 1.56 (d,  $J = 6.94$  Hz), 5.11 (d,  $J = 2.84$  Hz), 5.29-5.38 (m), 7.50-7.57 (m), 7.62-7.67 (m), 7.70 (d,  $J = 7.57$ ) 8.86 (s), 9.02 (s);  $^{13}\text{C}$  NMR (125 MHz, DMSO)  $\delta$  11.9, 15.2, 57.5, 58.4, 83.0, 83.4, 122.9, 123.1, 123.4, 123.8, 128.8, 129.0, 131.8, 132.1, 132.4, 142.9, 143.0, 169.4, 169.8; HRMS (CI) calcd for  $[\text{C}_{10}\text{H}_{11}\text{N}_2\text{O}_3]^+$ : 207.0770, found: 207.0763

### Kinetic analysis of tandem reaction

Kinetic analysis of the tandem reaction with aldehyde **1** was performed using time-dependent  $^1\text{H}$ -NMR-studies. Each starting material (0.2 mmol) and triethylamine (0.1 mmol) were dissolved in  $\text{CD}_3\text{CN}$  (600  $\mu\text{L}$ ), and the reaction followed until completion. The chemical kinetics software package Copasi 4.2 was adopted for fitting the resulting NMR-data to the kinetic model,<sup>1</sup> using the Levenberg-Marquardt method at a tolerance of  $1 \times 10^{-6}$  for parameter fitting. Estimated kinetic parameters:  $k_1$ :  $7.2 \times 10^{-2} \text{ M}^{-1} \text{ min}^{-1}$  (SD:  $1.4 \times 10^{-3} \text{ M}^{-1} \text{ min}^{-1}$ ),  $k_{-1}$ :  $5.6 \times 10^{-3} \text{ min}^{-1}$  (SD:  $3.3 \times 10^{-4} \text{ min}^{-1}$ ),  $k_2$ :  $1.4 \times 10^{-2} \text{ min}^{-1}$  (SD:  $1.2 \times 10^{-4} \text{ min}^{-1}$ ), where  $k_1$  and  $k_{-1}$  are the rate constants of the forward and reverse Henry reaction, respectively, and  $k_2$  is the rate constant for the consecutive cyclization step.

<sup>1</sup> S. Hoops, S. Sahle, R. Gauges, C. Lee, J. Pahle, N. Simus, M. Singhal, L. Xu, P. Mendes and U. Kummer, *Bioinformatics* 2006, **22**, 3067-3074.
